# Supplementary material for: A workflow for simplified analysis of ATAC-cap-seq data in R
Source: PubMed Central journal article supplement (PMC6047409; doi:10.1093/gigascience/giy080), 2018-06-28
Supplement: giy080_response_to_reviewer_comments_revision_2.pdf [file giy080_response_to_reviewer_comments_revision_2.pdf]

## Author's Response To Reviewer Comments

Close

None.

Close
